# Supplementary material for: The Enterotoxin Gene Profiles and Enterotoxin Production of Staphylococcus aureus Strains Isolated from Artisanal Cheeses in Belgium
Source: MDPI journal article supplement (doi:10.3390/foods12214019), 2023-11-03
Supplement: s1 [file s1]

Supplementary Material

# The Enterotoxin Gene Profiles and Enterotoxin Production of *Staphylococcus aureus* Strains Isolated from Artisanal Cheeses in Belgium

Raphaëlle Minutillo <sup>1†</sup>, Barbara Pirard <sup>1†</sup>, Abdelhak Fatihi <sup>2</sup>, Marina Cavaiuolo <sup>2</sup>, Donatien Lefebvre <sup>2</sup>, Amaury Gérard <sup>3</sup>, Bernard Taminiau <sup>1</sup>, Yacine Nia <sup>2</sup>, Jacques-Antoine Hennekinne <sup>2</sup>, Georges Daube <sup>1</sup> and Antoine Clinquart <sup>1\*</sup>

<sup>1</sup> Department of Food Sciences, Fundamental and Applied Research for Animals & Health (FARAH), Faculty of Veterinary Medicine, Avenue de Cureghem 10, 4000 Liege, Belgium; babs.pirard@gmail.com (B.P.); bernard.taminiau@uliege.be (B.T.); georges.daube@uliege.be (G.D.)

<sup>2</sup> Laboratory for Food Safety, French Agency for Food, Environmental and Occupational Health & Safety (ANSES), Université Paris-Est, 94700 Maisons-Alfort, France; abdelhak.fatihi@anses.fr (A.F.); marina.cavaiuolo@anses.fr (M.C.); donatien.lefebvre@catalent.com (D.L.); yacine.nia@anses.fr (Y.N.); jacques-antoine.hennekinne@anses.fr (J.-A.H.)

<sup>3</sup> Brewing and Food Science Unit, LABIRIS, Avenue Emile Gryzon 1, 1070 Anderlecht, Belgium; agerard@spfb.brussels

\* Correspondence: antoine.clinquart@uliege.be

† These authors contributed equally to this work.

**Table S1.** Identification of genes coding for enterotoxins with the NAuRA genetic tool in 49 strains of the *S. aureus* isolated from the different Belgian artisanal cheeses. Each number corresponds to an allele variant coding for an enterotoxin. When toxin was detected via LC-MS, the letter T was added. NA: non-applicable, toxin not searched. +: SEG truncated gene.

| Strain   | SEA | SEC  | SEG | SEI  | SEL | SEM  | SEN | SEO | SEP | SEIU | SEIX | SEY | SEIW  | SEIZ | TSST1 |
|----------|-----|------|-----|------|-----|------|-----|-----|-----|------|------|-----|-------|------|-------|
| 03A-1 D0 |     |      | 3/T | 4/T  |     | 23/T | 3/T | 3/T | 2/T |      | 9/T  |     |       |      |       |
| 03A-1 DE |     |      |     |      |     |      |     |     |     |      | 6/T  |     |       |      |       |
| 03A-2 D0 |     |      |     |      |     |      |     |     |     |      | 6/T  |     |       |      |       |
| 03B-1 D0 |     |      |     |      |     |      |     |     |     |      | 6/T  |     |       |      |       |
| 03B-2 D0 |     |      |     |      |     |      |     |     |     |      | 6/T  |     |       |      |       |
| 03C-1 D0 |     |      |     |      |     |      |     |     |     |      | 6/T  |     |       |      |       |
| 03C-2 D0 |     |      |     |      |     |      |     |     |     |      | 6/T  |     |       |      |       |
| 13A-1 DE |     | 14/T |     |      | 2/T |      |     |     |     |      | 7/T  |     | 13/NA |      | 2/T   |
| 13B-1 D0 | 2/T | 2/T  |     |      | 2/T |      |     |     |     |      | 7    |     | 13/NA |      | 2/T   |
| 13C-1 DE | 2/T | 2/T  |     |      | 2/T |      |     |     |     |      | 7    |     | 13/NA |      | 2/T   |
| 18C-1 D0 |     |      | 16  | 14/T |     | 22/T | 15  | 11  |     | 12/T | 31/T |     | 28/NA |      |       |
| 23A-1 D0 |     |      | +/T | 8/T  |     | 21   | 6   | 5   |     | 9    | 12/T | 4/T |       | 1/T  |       |
| 23A-1 DE |     |      | +   | 8    |     | 21   | 6   | 5   |     | 9    | 12/T | 4/T |       | 1/T  |       |
| 23A-2 D0 |     |      | +   | 8/T  |     | 21   | 6   | 5   |     | 9    | 12/T | 4/T |       | 1/T  |       |
| 23A-2 DE |     |      | +   | 8    |     | 21   | 6   | 5   |     | 9    | 12/T | 4/T |       | 1/T  |       |
| 23B-1 D0 |     |      | +   | 8/T  |     | 21   | 6   | 5   |     | 9    | 12/T | 4/T |       | 1/T  |       |
| 23B-1 DE |     |      | +   | 8    |     | 21   | 6   | 5   |     | 9    | 12   | 4/T |       | 1/T  |       |
| 23B-2 D0 |     |      | +   | 8    |     | 21   | 6   | 5   |     | 9    | 12/T | 4/T |       | 1/T  |       |
| 23B-2 DE |     |      | +   | 8    |     | 21   | 6   | 5   |     | 9    | 12   | 4/T |       | 1/T  |       |
| 23C-1 D0 |     |      | +   | 8/T  |     | 21   | 6   | 5   |     | 9    | 12/T | 4/T |       | 1/T  |       |
| 23C-1 DE |     |      | +   | 8    |     | 21   | 6   | 5   |     | 9    | 12/T | 4/T |       | 1/T  |       |

|                                   |     |     |      |     |      |    |      |      |      |     |       |         |
|-----------------------------------|-----|-----|------|-----|------|----|------|------|------|-----|-------|---------|
| 23C-2 DE                          |     | +/T | 8    |     | 21   | 6  | 5    | 9    | 12   | 4/T |       | 1/T     |
| 24B-1 DE                          |     | +/T | 8    |     | 21/T | 6  | 5/T  | 9    | 12   | 4/T |       | 1/T     |
| 26C-1 DE                          |     | 16  | 14/T |     | 22/T | 15 | 11/T | 12/T | 31/T |     | 28/NA |         |
| 27A-1 D0                          | 15  | +   | 8    | 1/T |      | 6  | 5    | 9    | 12   | 4/T |       | 1/T 5/T |
| 27A-2 D0                          | 7/T | +   | 8/T  | 1/T |      | 6  | 5    | 9    | 12/T | 4/T |       | 1/T 5/T |
| 27B-1 D0                          | 7/T | +   | 8/T  | 1/T |      | 6  | 5    | 9    | 12/T | 4/T |       | 1/T 5/T |
| 27B-2 D0                          | 7/T | +   | 8    | 1/T |      | 6  | 5    | 9    | 12/T | 4/T |       | 1/T 5/T |
| 27C-1 D0                          | 7/T | +   | 8/T  | 1/T |      | 6  | 5    | 9    | 12/T | 4/T |       | 1/T 5/T |
| 27C-2 D0                          | 7/T | +   | 8    | 1/T |      | 6  | 5    | 9    | 12   | 4/T |       | 1/T 5/T |
| 28A-1 D0                          |     |     |      |     |      |    |      |      | 56/T |     |       |         |
| 28B-1 D0                          |     |     |      |     |      |    |      |      | 56/T |     |       |         |
| 28B-2 D0                          |     |     |      |     |      |    |      |      | 56/T |     |       |         |
| 29A-1 D0                          |     |     |      |     |      |    |      |      | 6/T  |     |       |         |
| 29A-1 DE<br>(low<br>coverage<br>) |     |     |      |     |      |    |      |      | 6/T  |     |       |         |
| 29A-2 D0                          |     |     |      |     |      |    |      |      | 6/T  |     |       |         |
| 29A-2 DE<br>(low<br>coverage<br>) |     |     |      |     |      |    |      |      | 6/T  |     |       |         |
| 29B-1 D0<br>(contami<br>nation)   |     |     |      |     |      |    |      |      | 6/T  |     |       |         |
| 29B-2 D0                          |     |     |      |     |      |    |      |      | 6/T  |     |       |         |
| 29C-1 D0                          |     |     |      |     |      |    |      |      | 6/T  |     |       |         |
| 29C-1 DE                          |     |     |      |     |      |    |      |      | 6/T  |     |       |         |
| 29C-2 D0                          |     |     |      |     |      |    |      |      | 6/T  |     |       |         |
| 29C-2 DE                          |     |     |      |     |      |    |      |      | 6/T  |     |       |         |
| 32A-1 D0                          |     | +/T | 8    |     |      | 6  | 27   | 9    | 12   | 4/T |       | 1/T     |
| 32A-2 D0                          |     | +/T | 8/T  |     |      | 6  | 5    | 9    | 12/T | 4/T |       | 1/T     |
| 32B-1 D0                          |     | +/T | 8/T  |     |      | 6  | 5    | 9    | 12/T | 4/T |       | 1/T     |
| 32B-2 D0                          |     | +/T | 8/T  |     |      | 6  | 5    | 9    | 12/T | 4/T |       | 1/T     |
| 32C-1 D0                          |     | +/T | 8/T  |     |      | 6  | 5    | 9    | 12/T | 4/T |       | 1/T     |
| 32C-2 D0                          |     | +/T | 8/T  |     |      | 6  | 5    | 9    | 12/T | 4/T |       | 1/T     |

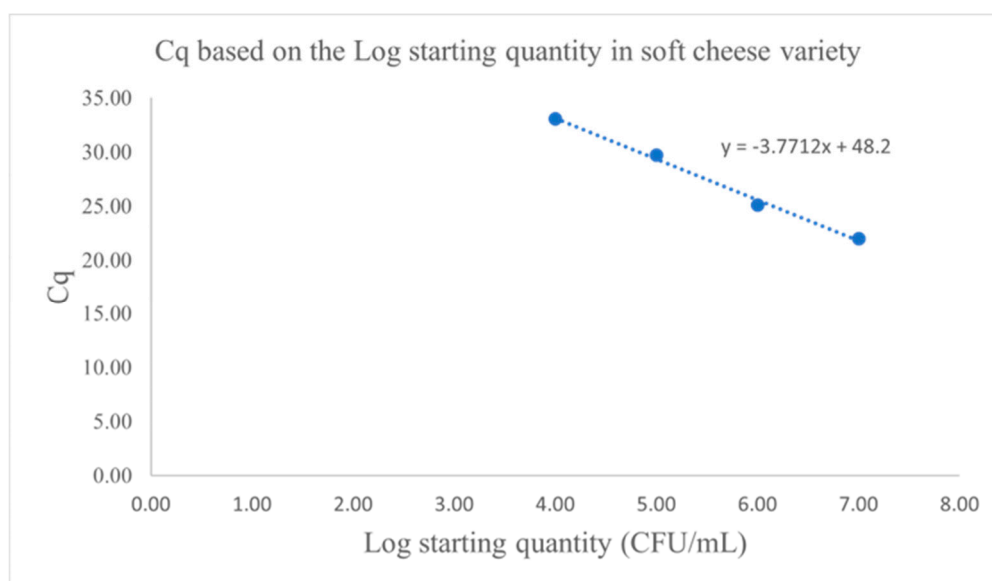**a**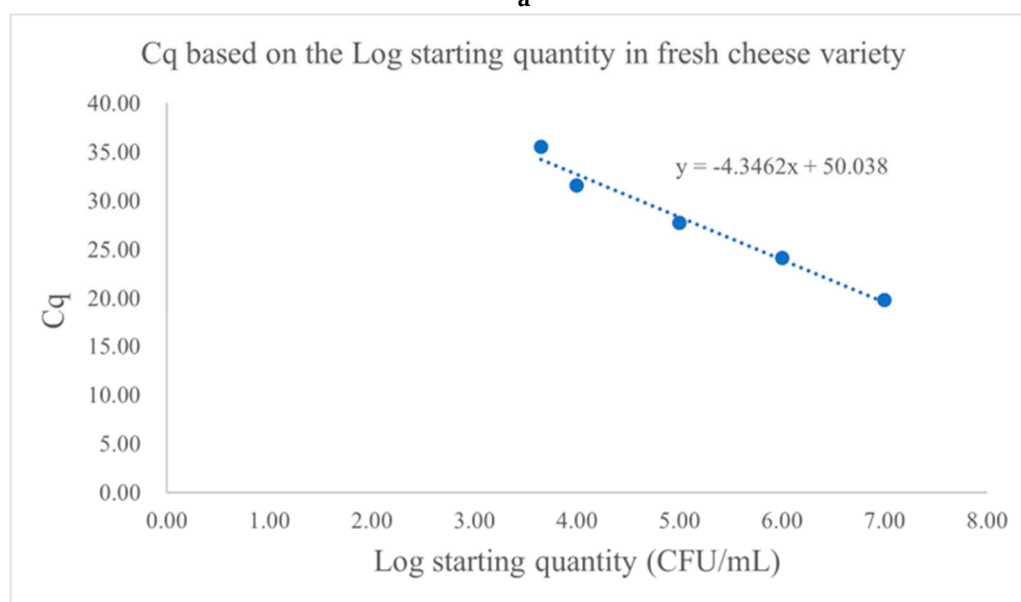**b**

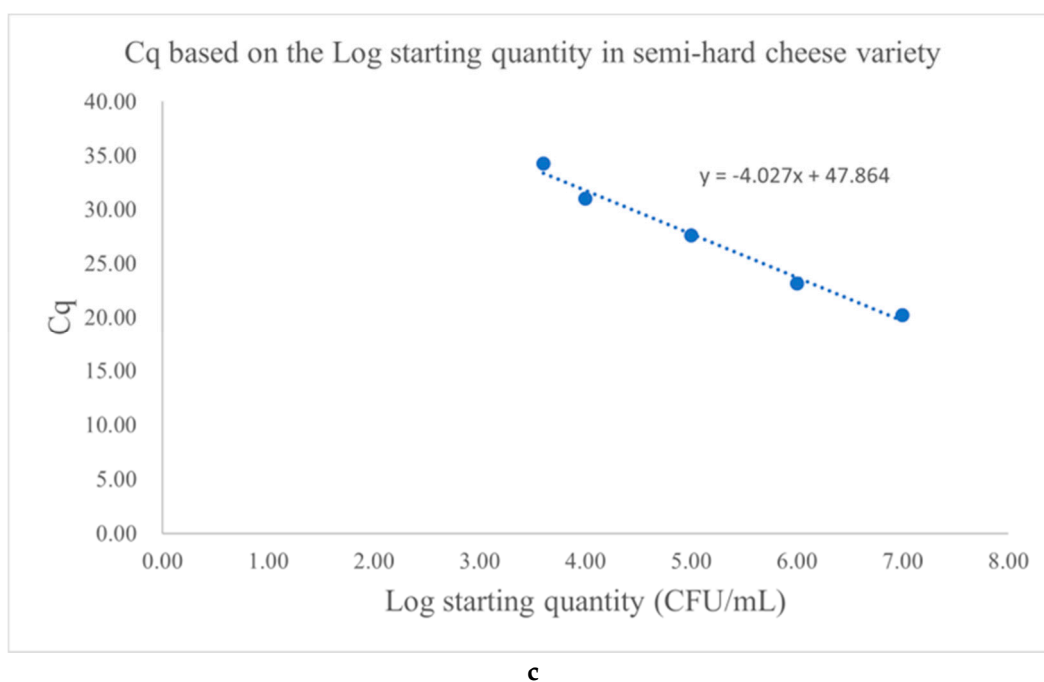

**Figure S1.** Standard curve for *nuc* gene qPCR of cheese suspensions inoculated with *S. aureus* ATCC29213.

**Table S2.** Description of the main characteristics of the different cheese varieties studied.

| Variety | Type of cheese | Sub-type of cheese | Ripening time (weeks) | Shelf life (days) | Origin of milk | Type of milk |
|---------|----------------|--------------------|-----------------------|-------------------|----------------|--------------|
| 1       | SC             | Smear-coat         | 3                     | 40                | Cow            | Raw          |
| 2       | FC             | Type maquée        | 0                     | 19                | Cow            | Raw          |
| 3       | FC             | Type maquée        | 0                     | 14                | Cow            | Raw          |
| 4       | FC             | Type maquée        | 0                     | 16                | Cow            | Pasteurized  |
| 5       | FC             | Mold-drained       | 0                     | 10                | Ewe            | Pasteurized  |
| 6       | SC             | Bloomy rind        | 2                     | 30                | Goat           | Raw          |
| 7       | FC             | Type maquée        | 0                     | 7                 | Cow            | Raw          |
| 8       | FC             | Type maquée        | 0                     | 12                | Cow            | Raw          |
| 9       | SHC            | Type Gouda         | 8                     | 21                | Ewe            | Pasteurized  |
| 10      | SHC            | Type Saint-Paulin  | 12                    | 21                | Ewe            | Raw          |
| 11      | SHC            | Type Saint-Paulin  | 6                     | 14                | C              | Raw          |
| 12      | SHC            | Curd-pressed       | 24                    | 14                | Cow            | Raw          |
| 13      | FC             | Fresh              | 0                     | 15                | Goat           | Raw          |
| 14      | SHC            | Type Gouda         | 8                     | 21                | Cow            | Pasteurized  |
| 15      | SHC            | Type Gouda         | 3                     | 30                | Cow            | Pasteurized  |
| 16      | FC             | Mold-drained       | 0                     | 8                 | Goat           | Raw          |
| 17      | FC             | Mold-drained       | 0                     | 14                | Cow            | Raw          |
| 18      | SHC            | Type Gouda         | 6                     | 21                | Cow            | Raw          |
| 19      | SC             | Bloomy rind        | 3                     | 30                | Cow            | Pasteurized  |
| 20      | SC             | Bloomy rind        | 2                     | 30                | Cow            | Raw          |
| 21      | SHC            | Type Saint-Paulin  | 3                     | 21                | Cow            | Raw          |
| 22      | FC             | Type maquée        | 0                     | 10                | Goat           | Raw          |
| 23      | SHC            | Type Saint-Paulin  | 6                     | 30                | Cow            | Raw          |

|    |     |                   |   |    |     |     |
|----|-----|-------------------|---|----|-----|-----|
| 24 | SHC | Type Saint-Paulin | 2 | 21 | Cow | Raw |
| 25 | FC  | Type maquée       | 0 | 10 | Cow | Raw |
| 26 | SHC | Type Saint-Paulin | 5 | 14 | Cow | Raw |
| 27 | SC  | Smear-coat        | 2 | 30 | Cow | Raw |
| 28 | FC  | Type maquée       | 0 | 10 | Cow | Raw |
| 29 | SC  | Bloomy rind       | 3 | 28 | Cow | Raw |
| 30 | SC  | Smear-coat        | 4 | 30 | Cow | Raw |
| 31 | SC  | Smear-coat        | 3 | 40 | Cow | Raw |
| 32 | SHC | Type Saint-Paulin | 3 | 14 | Cow | Raw |

Legend: SC: soft cheese; FC: fresh cheese; SHC: semi-hard cheese. In Belgium, 'type maquée' is a typical white cheese/cottage cheese originating from Wallonia. Lost samples are shown in grey.
